# Supplementary material for: A comparative study of palladium-gold and palladium-tin catalysts in the direct synthesis of H2O2
Source: Royal Society of Chemistry journal article supplement (doi:10.1039/d3gc03706a), 2023-01-01
Supplement: d3gc03706a1.pdf [file d3gc03706a1.pdf]

## Supporting Information

### **A Comparative Study of Palladium-Gold and Palladium-Tin Catalysts in the Direct Synthesis of H<sub>2</sub>O<sub>2</sub>.**

Dávid Kovačič<sup>a†</sup>, Richard J. Lewis<sup>a†\*</sup>, Caitlin M. Crombie<sup>a</sup>, David J. Morgan<sup>a,b</sup>, Thomas E. Davies<sup>a</sup>, Ángeles López-Martín<sup>a</sup>, Tian Qin<sup>c</sup>, Christopher S. Allen<sup>f,g</sup>, Jennifer. K. Edwards<sup>d</sup>, Liwei Chen<sup>c</sup>, Martin Skov-Skjøth Rasmussen<sup>e</sup>, Xi Liu<sup>c\*</sup> and Graham J. Hutchings<sup>a\*</sup>

<sup>a</sup>Max Planck–Cardiff Centre on the Fundamentals of Heterogeneous Catalysis FUNCAT, Cardiff Catalysis Institute, School of Chemistry, Cardiff University, Cardiff, CF24 4HQ, UK.

<sup>b</sup>Harwell XPS, Research Complex at Harwell (RCaH) Didcot, OX11 0FA, UK

<sup>c</sup>In-situ Centre for Physical Sciences, School of Chemistry and Chemical, Frontiers Science Centre for Transformative Molecules, Shanghai 200240, P. R. China

<sup>d</sup>Cardiff Catalysis Institute, School of Chemistry, Cardiff University, Main Building, Park Place, Cardiff, CF10 3AT, UK.

<sup>e</sup>Haldor Topsøe A/S, Haldor Topsøes Allé 1, DK-2800 Kongens Lyngby, Denmark

<sup>f</sup>Electron Physical Sciences Imaging Centre, Diamond Light Source Ltd, Didcot, OX11 0DE, United Kingdom

<sup>g</sup>Department of Materials, University of Oxford, Oxford. OX1 3PH. UK

<sup>†</sup>These authors contributed equally to this work.

\*LewisR27@cardiff.ac.uk, LiuXi@sjtu.edu.cn, Hutch@cardiff.ac.uk

**Table S.1.** Surface area measurements of Pd-based TiO<sub>2</sub> supported catalysts, as determined by BET.

| Catalyst                         | Surface Area / m <sup>2</sup> g <sup>-1</sup> * |
|----------------------------------|-------------------------------------------------|
| TiO <sub>2</sub>                 | 59                                              |
| 0.5%Pd/TiO <sub>2</sub>          | 57                                              |
| 0.25%Pd/TiO <sub>2</sub>         | 56                                              |
| 0.25%Pd-0.25%Au/TiO <sub>2</sub> | 55                                              |
| 0.25%Pd-0.50%Au/TiO <sub>2</sub> | 55                                              |
| 0.25%Pd-0.75%Au/TiO <sub>2</sub> | 52                                              |
| 0.25%Pd-1.5%Au/TiO <sub>2</sub>  | 48                                              |
| 0.25%Pd-2.25%Au/TiO <sub>2</sub> | 48                                              |
| 0.25%Pd-0.25%Sn/TiO <sub>2</sub> | 57                                              |
| 0.25%Pd-0.50%Sn/TiO <sub>2</sub> | 53                                              |
| 0.25%Pd-0.75%Sn/TiO <sub>2</sub> | 51                                              |
| 0.25%Pd-1.5%Sn/TiO <sub>2</sub>  | 51                                              |
| 0.25%Pd-2.25%Sn/TiO <sub>2</sub> | 50                                              |

**Note:** All catalysts were exposed to an oxidative reductive heat treatment prior to use (static air, 400 °C, 3 h, 10 °Cmin<sup>-1</sup>). The TiO<sub>2</sub> support was analysed as received from suppliers. \*Surface area determined from nitrogen adsorption measurements using the BET equation.

**Table S.2.** A comparison of catalytic performance at iso-conversion.

| Catalyst                         | Reaction time / min | H <sub>2</sub><br>Conversion / % | H <sub>2</sub> O <sub>2</sub><br>Selectivity / % | H <sub>2</sub> O <sub>2</sub><br>Conc. / wt. % |
|----------------------------------|---------------------|----------------------------------|--------------------------------------------------|------------------------------------------------|
| 0.5%Pd/TiO <sub>2</sub>          | 5                   | 16                               | 78                                               | 0.07                                           |
| 0.25%Pd-0.25%Au/TiO <sub>2</sub> | 5                   | 14                               | 83                                               | 0.07                                           |
| 0.25%Pd-0.25%Sn/TiO <sub>2</sub> | 10                  | 16                               | 91                                               | 0.08                                           |
| 0.5%Pd/TiO <sub>2</sub>          | 15                  | 42                               | 47                                               | 0.11                                           |
| 0.25%Pd-0.25%Au/TiO <sub>2</sub> | 20                  | 47                               | 65                                               | 0.17                                           |
| 0.25%Pd-0.25%Sn/TiO <sub>2</sub> | 60                  | 47                               | 57                                               | 0.12                                           |

**H<sub>2</sub>O<sub>2</sub> direct synthesis reaction conditions:** Catalyst (0.01g), H<sub>2</sub>O (2.9g), MeOH (5.6g), 5% H<sub>2</sub> / CO<sub>2</sub> (420 psi), 25% O<sub>2</sub> / CO<sub>2</sub> (160 psi), 20 °C 1200 rpm. **Note:** Reaction rates are based on theoretical metal loading.

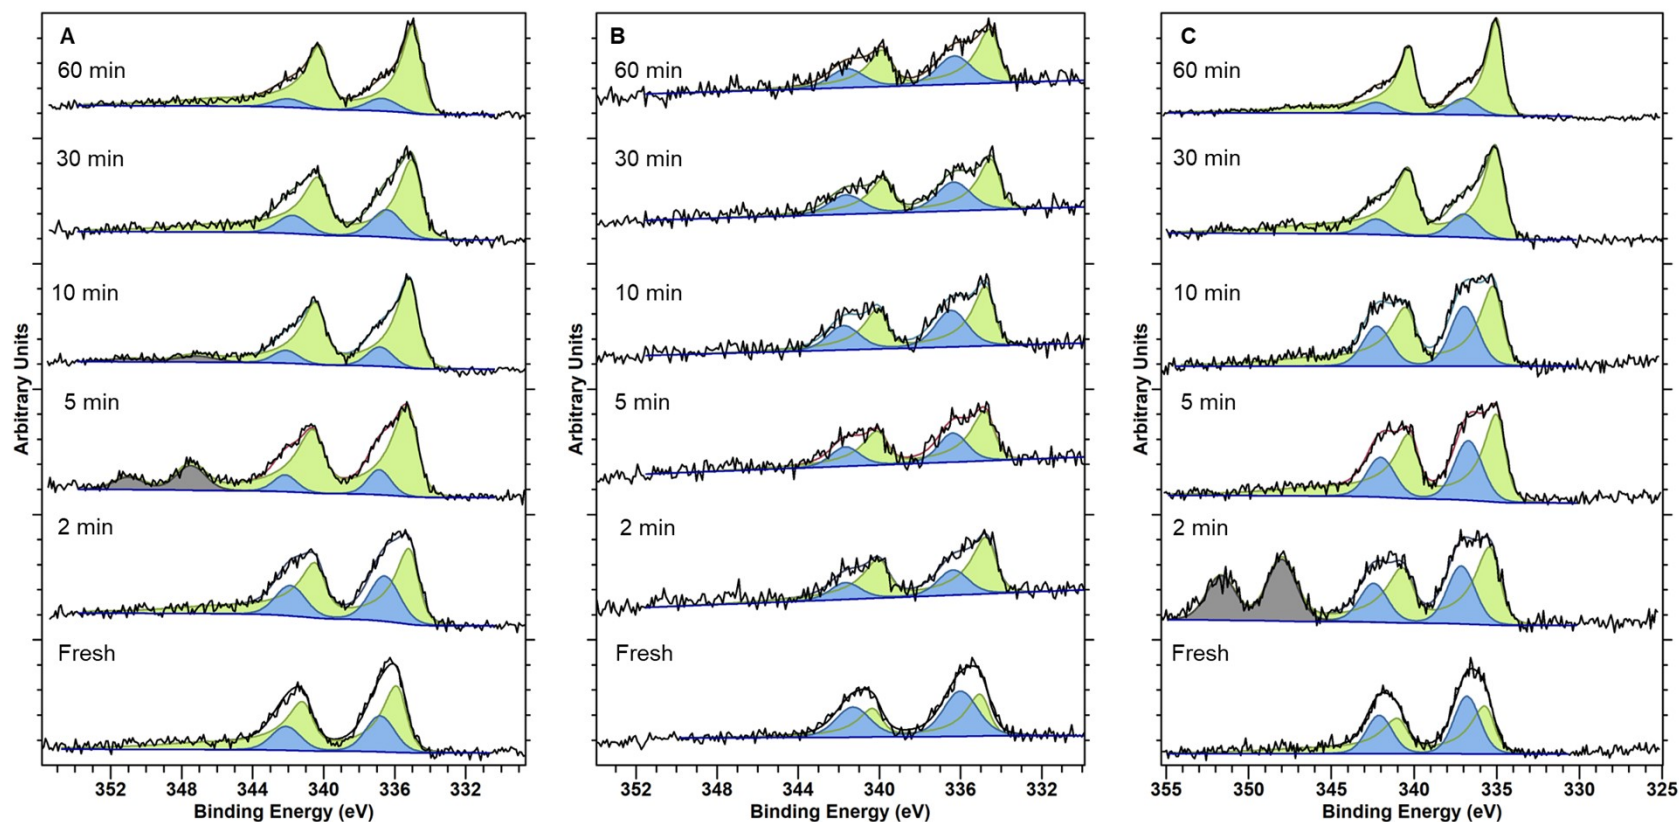

**Figure S.1.** XPS spectra of Pd(3d) regions of the (A) 0.5%Pd/TiO<sub>2</sub>, (B) 0.25%Pd-0.25%Au/TiO<sub>2</sub> and (C) 0.25%Pd-0.25%Sn/TiO<sub>2</sub> catalysts, as a function of reaction time. **Key:** Pd<sup>0</sup> (green) Pd<sup>2+</sup> (blue), Ca<sup>2+</sup> (grey). **H<sub>2</sub>O<sub>2</sub> direct synthesis reaction conditions:** Catalyst (0.01g), H<sub>2</sub>O (2.9g), MeOH (5.6g), 5% H<sub>2</sub> / CO<sub>2</sub> (420 psi), 25% O<sub>2</sub> / CO<sub>2</sub> (160 psi), 20 °C 1200 rpm. **Note:** Used catalysts are dried under vacuum (30 °C, 16 h) prior to subsequent XPS analysis.

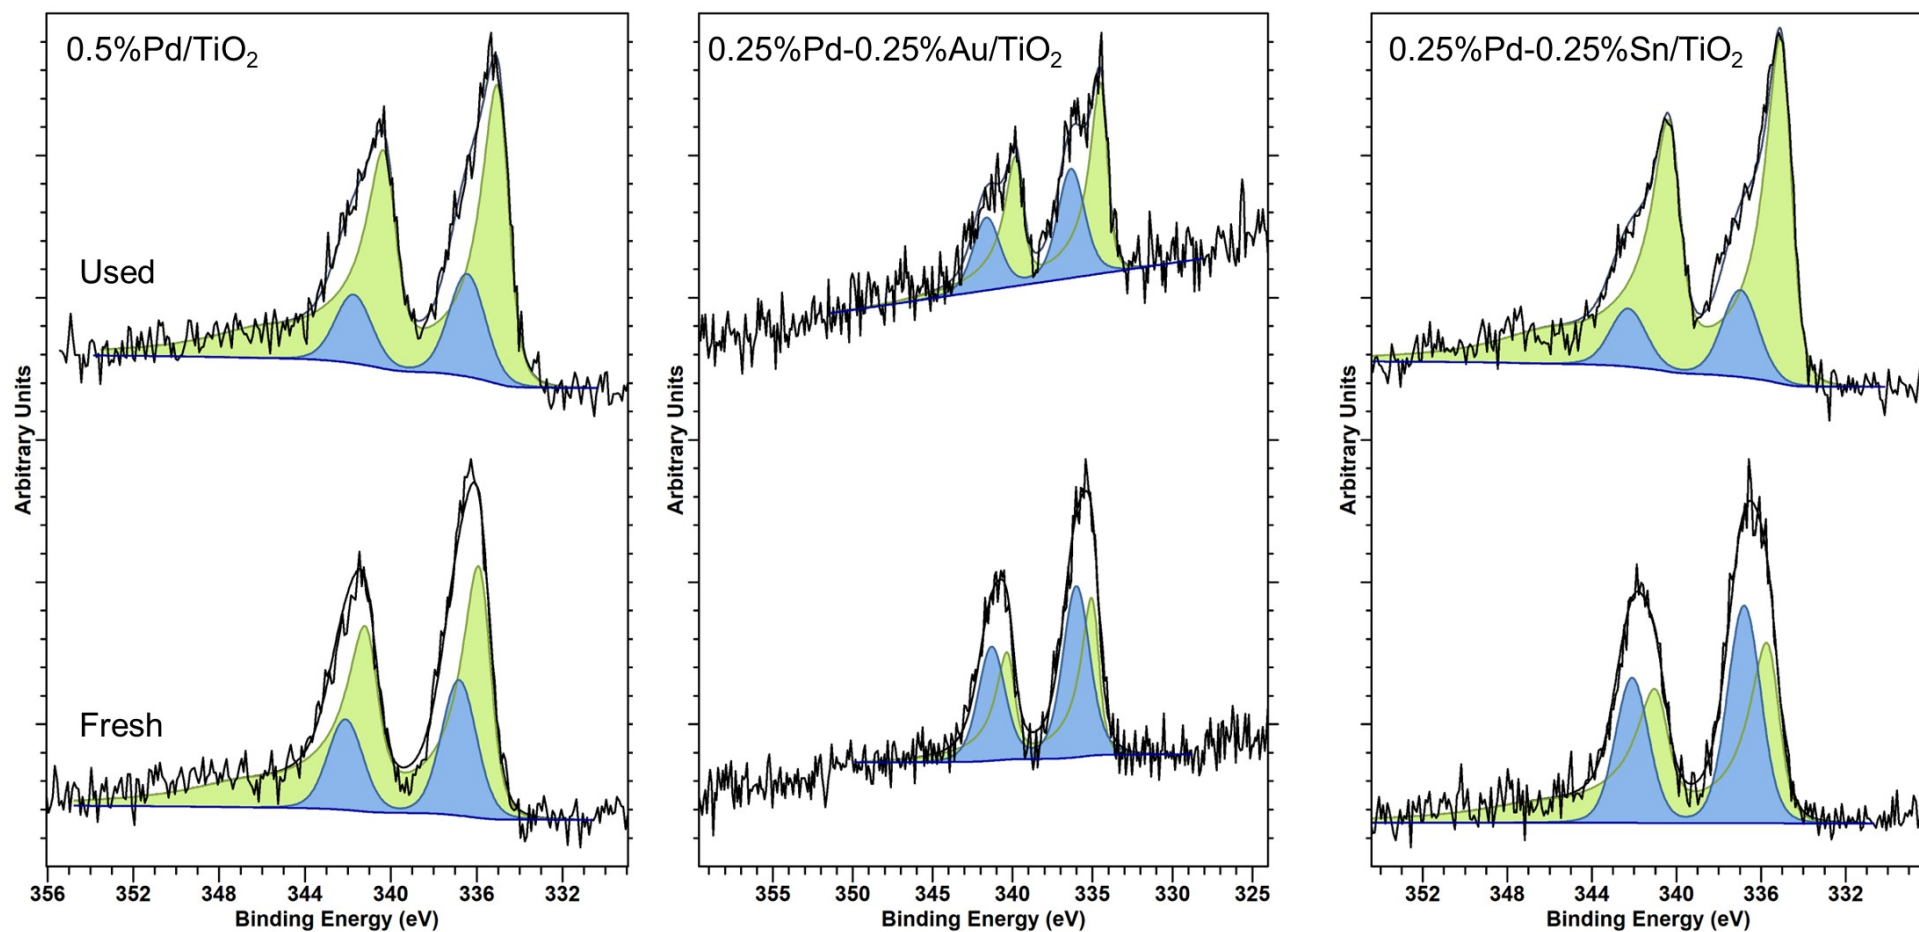

**Figure S.2.** XPS spectra of Pd(3d) regions of the as-prepared 0.5%Pd/TiO<sub>2</sub>, 0.25%Pd-0.25%Au/TiO<sub>2</sub> and 0.25%Pd-0.25%Sn/TiO<sub>2</sub> catalysts, in addition to analysis of the catalysts after use in the direct synthesis of H<sub>2</sub>O<sub>2</sub>. **Key:** Pd<sup>0</sup> (green) Pd<sup>2+</sup> (blue), Ca<sup>2+</sup> (grey). **H<sub>2</sub>O<sub>2</sub> direct synthesis reaction conditions:** Catalyst (0.01g), H<sub>2</sub>O (2.9g), MeOH (5.6g), 5% H<sub>2</sub> / CO<sub>2</sub> (420 psi), 25% O<sub>2</sub> / CO<sub>2</sub> (160 psi), 0.5 h, 20 °C 1200 rpm. **Note:** Used catalysts are dried under vacuum (30 °C, 16 h) prior to subsequent XPS analysis.

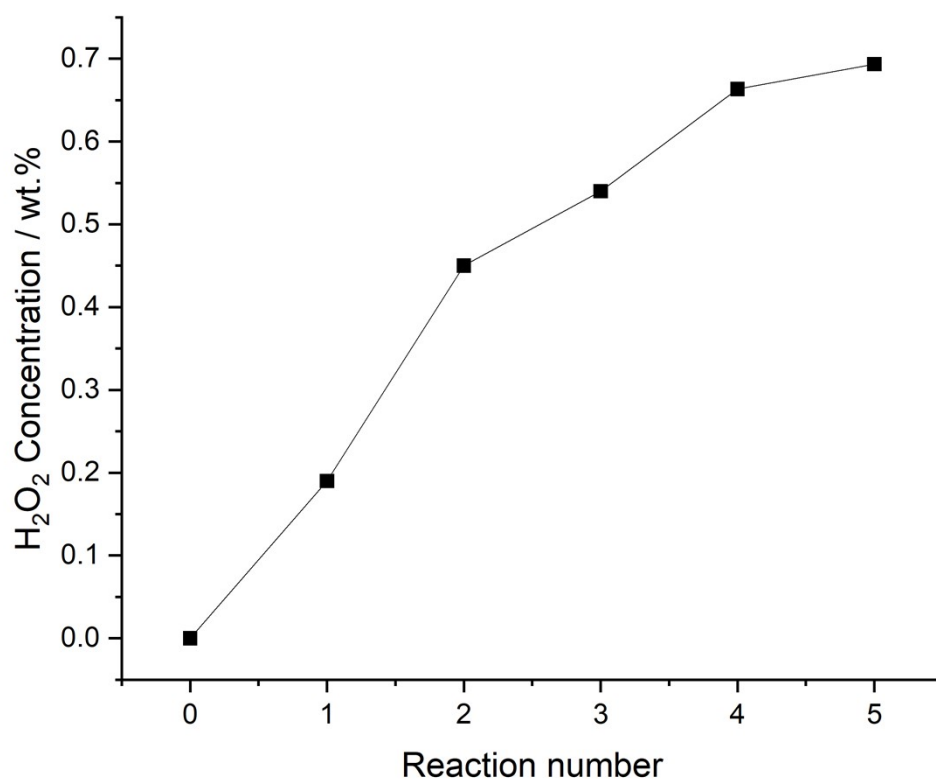

**Figure S.3.** Activity of the 0.25%Pd-2.25%Sn/TiO<sub>2</sub> catalyst over sequential  $\text{H}_2\text{O}_2$  synthesis reactions.  **$\text{H}_2\text{O}_2$  direct synthesis reaction conditions:** catalyst (0.01 g),  $\text{H}_2\text{O}$  (2.9 g), MeOH (5.6 g), 5%  $\text{H}_2/\text{CO}_2$  (420 psi), 25%  $\text{O}_2/\text{CO}_2$  (160 psi), 0.5 h, 20 °C, 1200 rpm.

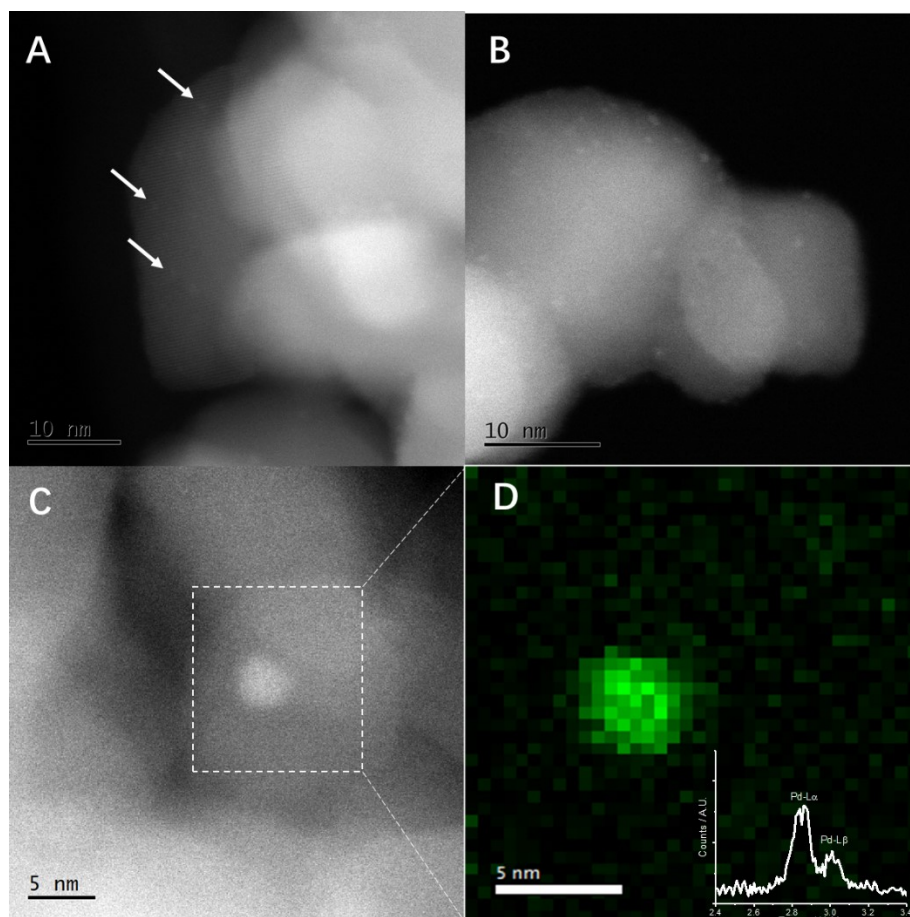

**Figure S.4.** Aberration corrected STEM images and XEDS mapping of the 0.25%Pd/TiO<sub>2</sub> catalyst **(A-B)** HAADF images showing the small, predominant <1nm Pd particles. **(C)** HAADF image of one of the few larger Pd particles suitable for **(D)** XEDS mapping to confirm the presence of Pd. **Note:** In all cases, active metallic species are identified by high Z-contrast (*i.e.* brighter regions of the micrograph).

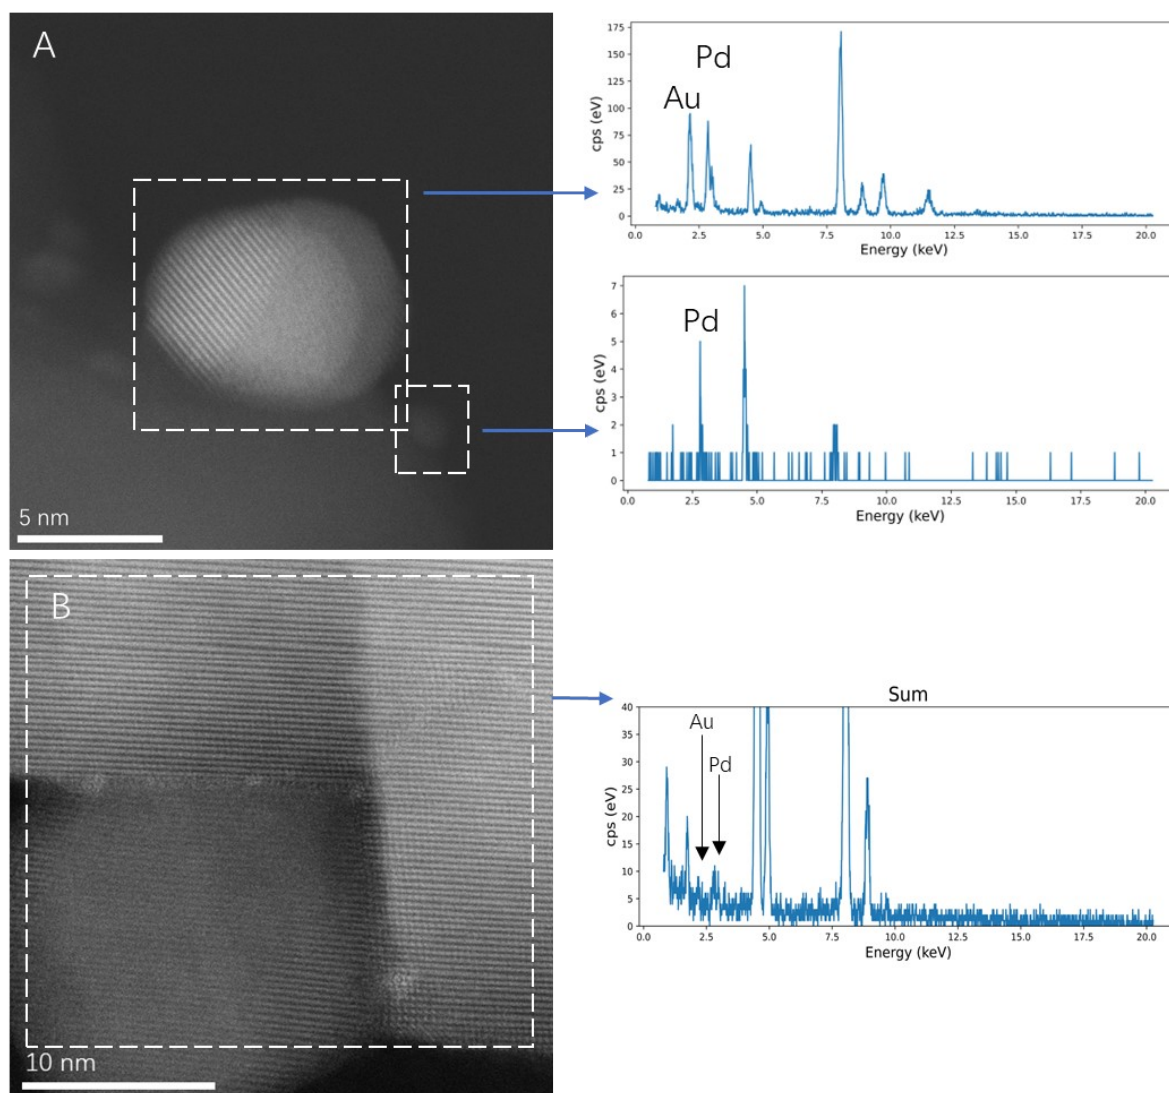

**Figure S.5.** Aberration corrected HAADF-STEM images and XEDS analysis of the 0.25%Pd-0.25%Au/TiO<sub>2</sub> catalyst. **(A)** XED spectra of areas indicated showing both Au and Pd in the larger particles and predominately Pd in the smaller particle highlighted. **(B)** HAADF-STEM image of the smaller clusters and associated XED spectra highlighting the presence of Au in a limited number of the smaller clusters. **Note:** In all cases, active metallic species are identified by high Z-contrast (*i.e.* brighter regions of the micrograph). Unlabelled signals in the XED spectra are those corresponding to the TiO<sub>2</sub> support, copper sample holder and Au-L transitions.



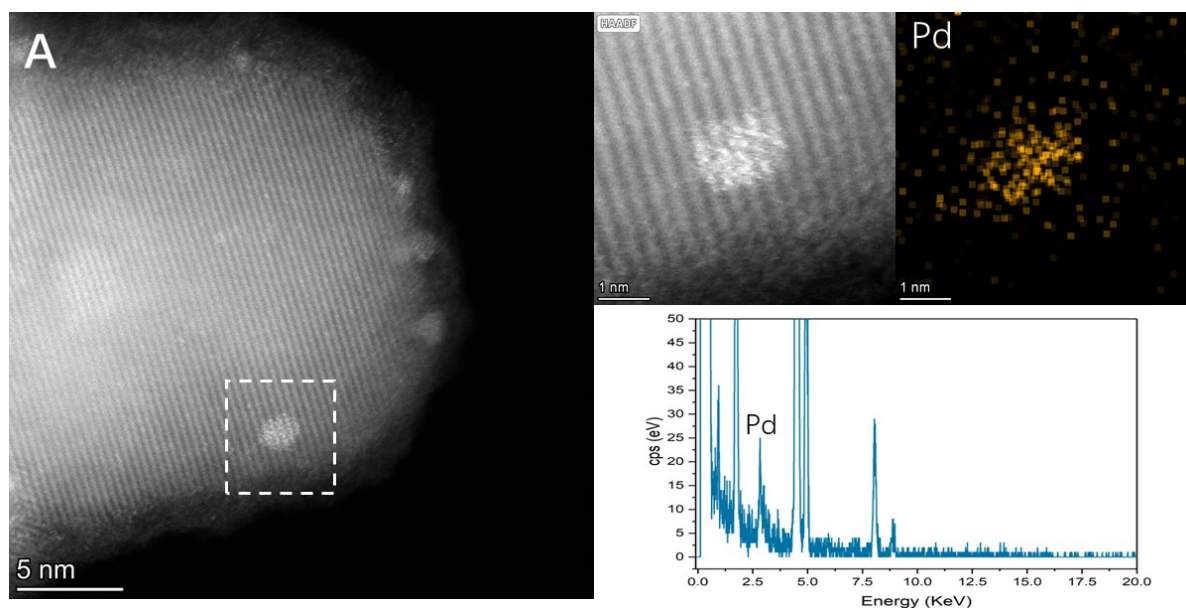

**Figure S.6.** Aberration corrected HAADF-STEM images and XEDS analysis of the 0.25%Pd-2.25%Sn/TiO<sub>2</sub> catalyst. **(A)** HAADF-STEM and XED spectra of area indicated showing the smaller particles present to be Pd. **Note:** In all cases, active metallic species are identified by high Z-contrast (*i.e.* brighter regions of the micrograph). Unlabelled signals in the XED spectra are those corresponding to the TiO<sub>2</sub> support, copper sample holder and Au-L transitions.



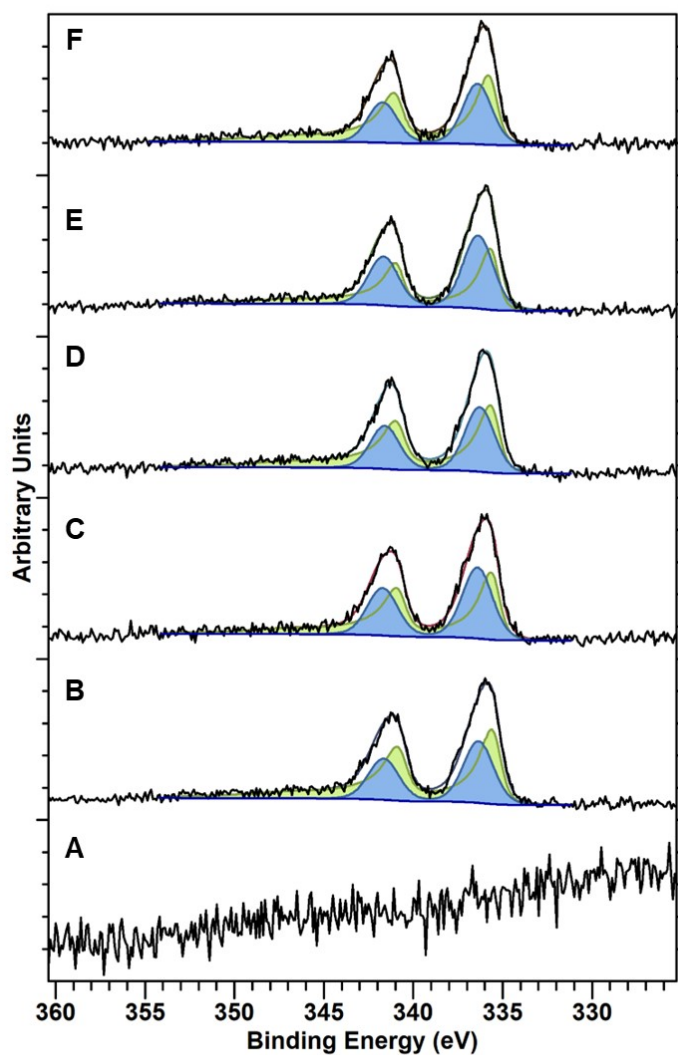

**Figure S.7.** XPS spectra of Pd(3d) regions of the as-prepared **(A)** 0.5%Sn/TiO<sub>2</sub>, **(B)** 0.25%Pd-0.25%Sn/TiO<sub>2</sub> and **(C)** 0.25%Pd-0.5%Sn/TiO<sub>2</sub> **(D)** 0.25%Pd-0.5%Sn/TiO<sub>2</sub> **(E)** 0.25%Pd-0.5%Sn/TiO<sub>2</sub> and **(F)** 0.25%Pd-0.5%Sn/TiO<sub>2</sub> catalysts. **Key:** Pd<sup>0</sup> (green) Pd<sup>2+</sup> (blue).
